# Supplementary material for: A potent antimalarial benzoxaborole targets a Plasmodium falciparum cleavage and polyadenylation specificity factor homologue
Source: PubMed Central journal article supplement (PMC5343452; doi:10.1038/ncomms14574), 2017-03-06

## Supplementary Tables

**Supplementary Table 1. Susceptibility to AN3661 of field isolates, laboratory strains, and parasites selected or modified *in vitro*.**

| Parasite               | IC <sub>50</sub> values (nM) | Number of assays | IC <sub>50</sub> fold change | PfCPSF3   | # copies of <i>pfmdr1</i> |
|------------------------|------------------------------|------------------|------------------------------|-----------|---------------------------|
| Field isolate 1        | 61 (36-104)                  | 1                | N/A                          | ND        | ND                        |
| Field isolate 2        | 152 (110-211)                | 1                | N/A                          | ND        | ND                        |
| Field isolate 3        | 25 (18-35)                   | 1                | N/A                          | ND        | ND                        |
| Field isolate 4        | 13 (9-19)                    | 1                | N/A                          | ND        | ND                        |
| Field isolate 5        | 73 (55-96)                   | 1                | N/A                          | ND        | ND                        |
| Field isolate 6        | 45 (33-61)                   | 1                | N/A                          | ND        | ND                        |
| Field isolate 7        | 53 (36-78)                   | 1                | N/A                          | ND        | ND                        |
| Field isolate 8        | 13 (10-17)                   | 1                | N/A                          | ND        | ND                        |
| Field isolate 9        | 14 (9-20)                    | 1                | N/A                          | ND        | ND                        |
| Field isolate 10       | 29 (27-31)                   | 1                | N/A                          | ND        | ND                        |
| Field isolate 11       | 162 (97-271)                 | 1                | N/A                          | ND        | ND                        |
| Field isolate 12       | 145 (121-173)                | 1                | N/A                          | ND        | ND                        |
| 3D7 <sup>a</sup>       | 34.3 ± 2.9                   | 3                | 1                            | ND        | 1                         |
| W2 <sup>a</sup>        | 31.2 ± 3.0                   | 13               | 1                            | WT        | 1                         |
| W2-R1 <sup>a</sup>     | 101 ± 20.0                   | 6                | 3                            | WT        | 3                         |
| W2-R2 <sup>a</sup>     | 414 ± 31.9                   | 3                | 13                           | WT        | 4                         |
| W2-R3 <sup>a</sup>     | 722 ± 85.0                   | 6                | 23                           | D470N     | 4                         |
| W2-R3 <sup>rev a</sup> | 23.4 ± 3.2                   | 3                | 1                            | WT        | N.D.                      |
| W2-R4 <sup>a</sup>     | 6240 ± 870                   | 6                | 200                          | H36/D470N | 4                         |
| W2-R4 <sup>rev a</sup> | 2970 ± 133                   | 3                | 95                           | H36/D470N | N.D.                      |
| W2-R5 <sup>a</sup>     | 15300 ± 2940                 | 2                | 491                          | ND        | N.D.                      |
| W2-R5 <sup>rev a</sup> | 2270 ± 284                   | 3                | 73                           | H36/D470N | 3                         |
| Dd2 <sup>a, b</sup>    | 22.2 ± 3.0                   | 27               | 1                            | WT        | 3                         |
| Dd2-R1 <sup>a</sup>    | 395 ± 48.8                   | 3                | 18                           | D470N     | 3                         |
| Dd2-R2 <sup>a</sup>    | 921 ± 100                    | 3                | 41                           | D470N     | 3                         |

|                                   |             |    |    |       |   |
|-----------------------------------|-------------|----|----|-------|---|
| Dd2-Ra <sup>b</sup>               | 338 ± 38.4  | 9  | 16 | T406I | 3 |
| Dd2-Rb <sup>b</sup>               | 623 ± 83.4  | 11 | 29 | Y408S | 3 |
| Dd2-Rc <sup>b</sup>               | 225 ± 32.8  | 3  | 11 | T409A | 3 |
| Dd2 transf. C4 <sup>Φb</sup>      | 563 ± 123   | 5  | 25 | Y408S | 3 |
| Dd2 transf. C4 cl.4 <sup>Φb</sup> | 1550 ± 1070 | 2  | 70 | Y408S | 3 |
| Dd2 transf. C4 cl.7 <sup>Φb</sup> | 523 ± 179   | 2  | 24 | Y408S | 3 |
| Dd2 transf. D3 <sup>Φb</sup>      | 1110 ± 229  | 9  | 50 | Y408S | 3 |
| Dd2 transf. E1 <sup>Φb</sup>      | 272 ± 94.9  | 4  | 12 | T406I | 3 |
| Dd2 transf. F1 <sup>Φb</sup>      | 312 ± 96.2  | 4  | 14 | T406I | 3 |
| Dd2 transf. F3 <sup>Φb</sup>      | 300 ± 126   | 4  | 14 | T406I | 3 |

For field isolates, *ex vivo* IC<sub>50</sub>s were determined from single assays using a histidine-rich protein-2 ELISA. 95% confidence intervals (in parentheses) describe precision of IC<sub>50</sub> determined from the curve fit. For laboratory strains, each assay was done in duplicate, and values are shown as mean IC<sub>50</sub> ± S.E.M. <sup>a</sup>IC<sub>50</sub>s were calculated from 48 h dose-response data measured by flow cytometric analysis of parasites stained with YOYO-1 dye. <sup>b</sup>IC<sub>50</sub>s were calculated from 72 h dose-response data measured by flow cytometric analysis of parasites stained with SYBR Green I and Mitotracker Deep Red. <sup>Φ</sup>Dd2 parasites transfected with PFCPSF3 Y408S or T406I, as described in Fig. 5. WT: wild-type. ND: not determined. N/A: not applicable.

**Supplementary Table 2. Sensitivity of laboratory strains to AN3661 and standard antimalarials.**

|          | AN3661                | Chloroquine           | Atovaquone            | Artemisinin           |
|----------|-----------------------|-----------------------|-----------------------|-----------------------|
| Parasite | IC <sub>50</sub> (nM) | IC <sub>50</sub> (nM) | IC <sub>50</sub> (nM) | IC <sub>50</sub> (nM) |
| 3D7      | 52 ± 23               | <10 ± 1               | 2 ± 1                 | 29 ± 13               |
| K1       | 20 ± 3                | 411 ± 131             | 2 ± 0.5               | 19 ± 10               |
| Dd2      | 39 ± 21               | 425 ± 163             | 2 ± 1                 | 31 ± 11               |
| HB3      | 56 ± 4                | 14 ± 1                | 1 ± 0.5               | 28 ± 6                |
| FCR3     | 30 ± 3                | 176 ± 29              | 1370 ± 392            | 14 ± 1                |
| TM90C2B  | 28 ± 1                | 291 ± 39              | >5000                 | 30 ± 7                |

IC<sub>50</sub>s were calculated from 48 h dose-response data measured by [<sup>3</sup>H]-hypoxanthine incorporation, with 2-3 replicates for each concentration with each strain. Values indicate mean ± S.D., shown in nM. Fold change compared to 3D7 parasites, which are multi-drug sensitive.

**Supplementary Table 3. Activity of AN3661 against mammalian cell lines.**

| Cell line | Species                       | Cell lineage               | CC <sub>50</sub> values (μM) |
|-----------|-------------------------------|----------------------------|------------------------------|
| Jurkat    | <i>Homo sapiens</i>           | T lymphocyte               | 60.5                         |
| HeLa      | <i>Homo sapiens</i>           | Cervical endothelial cells | >100                         |
| HepG2     | <i>Homo sapiens</i>           | Hepatocyte                 | >30                          |
| L929      | <i>Mus musculus</i>           | Fibroblast                 | >48.5                        |
| Vero      | <i>Cercopithecus aethiops</i> | Kidney epithelial cells    | >20                          |

Cytotoxic activity of AN3661 against human, murine, or simian cell lines was measured in 3-day colorimetric assays using the tetrazolium dye MTT 3-(4,5-dimethylthiazol-2-yl)-2,5-diphenyltetrazolium bromide. CC<sub>50</sub> values are concentrations at which 50% cytotoxicity was observed. For each cell line assays included 2-3 replicates per concentration. All cells were from ATCC (catalogue numbers: Jurkat, TIB-152; HeLa, CCL-2; HepG2, HB-8065; L929, CCL-1; Vero, CCL-81).

**Supplementary Table 4. Time to recrudescence in AN3661- and atovaquone-pressured *Plasmodium falciparum* Dd2.**

| Compound   | Selection pressure (nM) | Initial inoculum    | Outcome                         |
|------------|-------------------------|---------------------|---------------------------------|
| AN3661     | 60                      | 1 x 10 <sup>8</sup> | 3 of 3 (19, 19, 19)             |
|            |                         | 1 x 10 <sup>7</sup> | 1 of 3 (23)                     |
|            |                         | 1 x 10 <sup>6</sup> | 2 of 3 (45, 56)                 |
| Atovaquone | 5                       | 1 x 10 <sup>8</sup> | 6 of 6 (24, 29, 36, 45, 45, 50) |
|            |                         | 1 x 10 <sup>7</sup> | 2 of 6 (45, 45)                 |
|            |                         | 1 x 10 <sup>6</sup> | 1 of 6 (45)                     |

Outcome shown as number of flasks in which parasites recrudescence out of total numbers of flasks subjected to drug pressure. In brackets, day on which parasites could be microscopically identified.

**Supplementary Table 5. Susceptibility to chloroquine in parasites selected for resistance to AN3661.**

| Parasite             | PfCPSF3    | <i>pfmdr1</i><br>copy # | IC <sub>50</sub> (nM) | IC <sub>50</sub> fold<br>change | Number of<br>assays |
|----------------------|------------|-------------------------|-----------------------|---------------------------------|---------------------|
| W2                   | WT         | 1                       | 45.8 ± 2.5            | 1.0                             | 3                   |
| W2-R1                | WT         | 3                       | 34.4 ± 2.0            | 0.8                             | 3                   |
| W2-R2                | WT         | 4                       | 19.8 ± 3.0            | 0.4                             | 6                   |
| W2-R3                | D470N      | 4                       | 11.9 ± 1.8            | 0.3                             | 6                   |
| W2-R3 <sup>rev</sup> | WT         | ND                      | 31.6 ± 4.5            | 0.7                             | 3                   |
| W2-R4                | H36Y/D470N | 4                       | 15.6 ± 2.2            | 0.3                             | 6                   |
| W2-R5                | H36Y/D470N | 3                       | 15.8 ± 4.0            | 0.3                             | 3                   |
| Dd2                  | WT         | 3                       | 53.6 ± 4.4            | 1.0                             | 3                   |
| Dd2-R1               | D470N      | 3                       | 21.5 ± 1.4            | 0.4                             | 3                   |
| Dd2-R2               | D470N      | 3                       | 16.1 ± 2.2            | 0.3                             | 3                   |

IC<sub>50</sub> values were calculated from 48 h dose-response data measured by flow cytometry of parasites stained with YOYO-1. Values indicate mean ± S.E.M., shown in nM. Fold change compared to parental lines. ND: not determined.

## Supplementary Table 6.

**Table S6. Whole-genome sequencing.**

| Parasite line                   | W2 (WT) | W2-R1 | W2-R2 | W2-R3 | W2-R4 | W2-R5 | Dd2 (WT) | Dd2-R1 | Dd2-R2 | Dd2-Ra cl.1 | Dd2-Ra cl.2 | Dd2-Rb cl.1 | Dd2-Rb cl.2 |
|---------------------------------|---------|-------|-------|-------|-------|-------|----------|--------|--------|-------------|-------------|-------------|-------------|
| Genome coverage (x)             | 19      | 152   | 25    | 24    | 161   | 106   | 106      | 174    | 62     | 110         | 120         | 124         | 105         |
| % covered by 5 or more reads    | 82      | 84    | 65    | 68    | 78    | 81    | 75       | 77     | 78     | 79          | 76          | 77          | 75          |
| SNPs identified                 |         |       |       |       |       |       |          |        |        |             |             |             |             |
| Top SNPs (200 per chromosome)   |         | 2834  | 2800  | 2802  | 2836  | 2805  |          | 2839   | 2806   | 2804        | 2804        | 2803        | 2802        |
| real SNPs*                      |         | 1506  | 819   | 1450  | 1544  | 1445  |          | 1400   | 1388   | 1035        | 1003        | 1055        | 1070        |
| SNPs covered by 5 or more reads |         | 1506  | 819   | 1178  | 1544  | 1443  |          | 1400   | 1386   | 1035        | 1003        | 1055        | 1070        |
| intergenic                      |         | 999   | 463   | 614   | 971   | 906   |          | 946    | 889    | 585         | 590         | 594         | 617         |
| Intronic                        |         | 150   | 71    | 71    | 151   | 135   |          | 114    | 102    | 120         | 100         | 121         | 127         |
| < 80% coverage has SNP          |         | 351   | 272   | 463   | 411   | 398   |          | 329    | 372    | 313         | 298         | 319         | 309         |
| Hypervariable genes             |         | 1     | 4     | 18    | 7     | 1     |          | 8      | 17     | 4           | 6           | 8           | 7           |
| synonymous                      |         | 0     | 2     | 9     | 0     | 0     |          | 0      | 3      | 5           | 4           | 4           | 3           |
| nonsynonymous                   |         | 5     | 7     | 3     | 4     | 3     |          | 3      | 3      | 8           | 5           | 9           | 7           |

\*compared to 3D7 ref genome and parental genome (W2 or Dd2)

**Supplementary Table 7. Parasites transfected with plasmids expressing *pfcpsf3* SNPs.**

---

| Name           | PfCPSF3 mutation | Selection strategy | Day post-transfection parasites are observed | Number of binding site mutations | Sequence (mutations in lower case) |
|----------------|------------------|--------------------|----------------------------------------------|----------------------------------|------------------------------------|
| Dd2 transf. F1 | T406I            | AN3661             | 16                                           | 3                                | tCCgTGcGTTATTATGGCTTCCC            |
| Dd2 transf. F3 | T406I            | AN3661             | 21                                           | 3                                | tCCgTGcGTTATTATGGCTTCCC            |
| Dd2 transf. E1 | T406I            | AN3661             | 17                                           | 9                                | tCCgTGcGTgATcATGGCcagtC            |
| Dd2 transf. C4 | Y408S            | WR+BSD             | 34                                           | 3                                | tCCgTGcGTTATTATGGCTTCCC            |
| Dd2 transf. D3 | Y408S            | AN3661             | 19                                           | 9                                | tCCgTGcGTgATcATGGCcagtC            |

---

Dd2 was co-transfected with a plasmid expressing Cas9 and *hdhfr*, and a plasmid expressing PfCPSF3 T406I or Y408S and blasticidin S-deaminase. Transfected parasites were maintained in media containing 170 nM AN3661 or media containing 2.5 nM WR99210 and 2 µg/ml blasticidin. Parasites that incorporated the PfCPSF3 mutations also incorporated either three or nine silent binding site mutations. The day at which parasites were first microscopically observed is noted. WR: WR99210. BSD: blasticidin.

**Supplementary Table 8. Primers used in this study.**

| Primer | Sequence                                        | Lab identification        | Assay                                       |
|--------|-------------------------------------------------|---------------------------|---------------------------------------------|
| 1      | AATGATACGGCGACCACCGA                            | 5Sol1_20                  | PCR amplification for WGS                   |
| 2      | CAAGCAGAAGACGGCATACG                            | 5Sol2_21                  | PCR amplification for WGS                   |
| 3      | TAAATAGTTTCCTTTGACAAATATTA                      | CPSF_1F                   | PCR amplification for PF3D7_1438500         |
| 4      | TTAATAGAAGAAAAACAATTTTATCT                      | CPSF_1R                   | PCR amplification for PF3D7_1438500         |
| 5      | TATAATTCCTTCAATTTGATTATTTAC                     | CPSF_2F                   | PCR amplification for PF3D7_1438500         |
| 6      | ATATATGAACGTTGTTAATAAGAATA                      | CPSF_2R                   | PCR amplification for PF3D7_1438500         |
| 7      | TAAATGTTTCATAAATACATAATGATT                     | CPSF_3F                   | PCR amplification for PF3D7_1438500         |
| 8      | AAAAAGAAATAGGAAAAAGATTTA                        | CPSF_3R                   | PCR amplification for PF3D7_1438500         |
| 9      | TCCATGTCAACAAAAACTTGATCA                        | CPSF98_F                  | Dideoxy sequencing for PF3D7_1438500        |
| 10     | TGCTGATGTGCTTACTGATCA                           | CPSF499_R                 | Dideoxy sequencing for PF3D7_1438501        |
| 11     | ACGGACTTGATAACCAATTAAT                          | CPSF585_F                 | Dideoxy sequencing for PF3D7_1438502        |
| 12     | TCTGTAAAGAATGAAATGGGTGA                         | CPSF996_R                 | Dideoxy sequencing for PF3D7_1438503        |
| 13     | ACCTTCTTTACAAATTCACCACA                         | CPSF1610_F                | Dideoxy sequencing for PF3D7_1438504        |
| 14     | GGCTTCCCCTGGTATGCTAC                            | CPSF1501_R                | Dideoxy sequencing for PF3D7_1438505        |
| 15     | TGTTTCTATTAATCCATAGTTT                          | CPSF2086_F                | Dideoxy sequencing for PF3D7_1438506        |
| 16     | TCCCAACGAAATAAGAGAATCA                          | CPSF1093_F                | Dideoxy sequencing for PF3D7_1438507        |
| 17     | TGTTTCTATTAATCCATAGTTT                          | CPSF2086_F                | Dideoxy sequencing for PF3D7_1438508        |
| 18     | TCACTAGCACCCCCTAGACA                            | CPSF2591_F                | Dideoxy sequencing for PF3D7_1438509        |
| 19     | AGGTGCCTGTATGTTTTAGTAGA                         | CPSF2017_R                | Dideoxy sequencing for PF3D7_1438510        |
| 20     | TGCATCTATAAACGATCAGACAAA                        | <i>pfmdr1</i> -Forward    | <i>pfmdr1</i> qPCR                          |
| 21     | TCGTGTGTTCCATGTGACTGT                           | <i>pfmdr1</i> -Reverse    | <i>pfmdr1</i> qPCR                          |
| 22     | 6FAM-TTTAATAACCCTGATCGAAATGGAACCTTTG-TAMRA      | <i>pfmdr1</i> -probe      | <i>pfmdr1</i> qPCR                          |
| 23     | TGATGTGCGCAAGTGATCC                             | <i>β-tubulin</i> -Forward | <i>b-tubulin</i> qPCR                       |
| 24     | TCCTTTGTGGACATCTTCCTC                           | <i>β-tubulin</i> -Reverse | <i>b-tubulin</i> qPCR                       |
| 25     | VIC-TAGCACATGCCGTTAAATATCTCCATGTCT-TAMRA        | <i>β-tubulin</i> -probe   | <i>b-tubulin</i> qPCR                       |
| 26     | ACCCATGCTGATTAGACAATT                           | 28SrRNA_3694F             | Northern blots                              |
| 27     | TCGTCTACGATTTGGGCT                              | 28SrRNA_4016R             | Northern blots                              |
| 28     | TGAACCTGCTGAATTTGGTA                            | 1cyspxn_147F              | Northern blots                              |
| 29     | ATACAGCATTTGTCTCCTTC                            | 1cyspxn_557R              | Northern blots                              |
| 30     | GAGATCCAGGAAGAGTCGAC                            | PNP_F                     | Northern blots                              |
| 31     | AAATCCCCTTCGTCCCATT                             | PNP_R                     | Northern blots                              |
| 32     | TCTCAAAAATTGATGAAGCC                            | FP2A_278F                 | Northern blots                              |
| 33     | CACCACTATGTAATCTCCAA                            | FP2A_817R                 | Northern blots                              |
| 34     | ATTGGGAAGCCATAATAACACAT                         | p5146                     | <i>pfcpsf3</i> gRNA                         |
| 35     | AAACATGTGTTATTATGGCTTCC                         | p5147                     | <i>pfcpsf3</i> gRNA                         |
| 36     | TCCGTGCGTGATCATGGCCAGTCCTGGTATGCTACAAAATGGAATAT | p5152                     | <i>pfcpsf3</i> gRNA binding site protection |
| 37     | TTATTGTCTTGATATAAATAACTAGATATTGATTCAAG          | p5153                     | <i>pfcpsf3</i> gRNA binding site protection |
| 38     | TCCGTGCGTTATTATGGCTTCCCCTGGTATGCTACAAAATGGAATAT | p5379                     | <i>pfcpsf3</i> gRNA binding site protection |
| 39     | GGGCCCCGAAAATAATGATAATGGTGATGG                  | p5150                     | <i>pfcpsf3</i> donor                        |
| 40     | GGATCCTAATAGTTTATGATCAATCATGGC                  | p5151                     | <i>pfcpsf3</i> donor                        |
| 41     | TAACCTTCAATTGTAAGAGACC                          | p5573                     | PCR <i>pfcpsf3</i> (5' UTR)                 |
| 42     | TGTTTTAATAGATAGGTATAACCC                        | p5574                     | PCR <i>pfcpsf3</i> (3' UTR)                 |
| 43     | TCAGCTTATTCTTATTAACAACG                         | p4808                     | <i>pfcpsf3</i> sequencing                   |
| 44     | AATATAGTATGTCTAGGGGGTGC                         | p4364                     | <i>pfcpsf3</i> sequencing                   |
| 45     | AATTACAGAACCACAAAATGTACC                        | p5563                     | <i>pfcpsf3</i> sequencing                   |
| 46     | TTTTACTAATGTCGAGAGAATCTC                        | p5564                     | <i>pfcpsf3</i> sequencing                   |
| 47     | CACATGGGTAGTAGGGACTCC                           | p5566                     | <i>pfcpsf3</i> sequencing                   |



## Supplementary Figures

### Supplementary Figure 1.

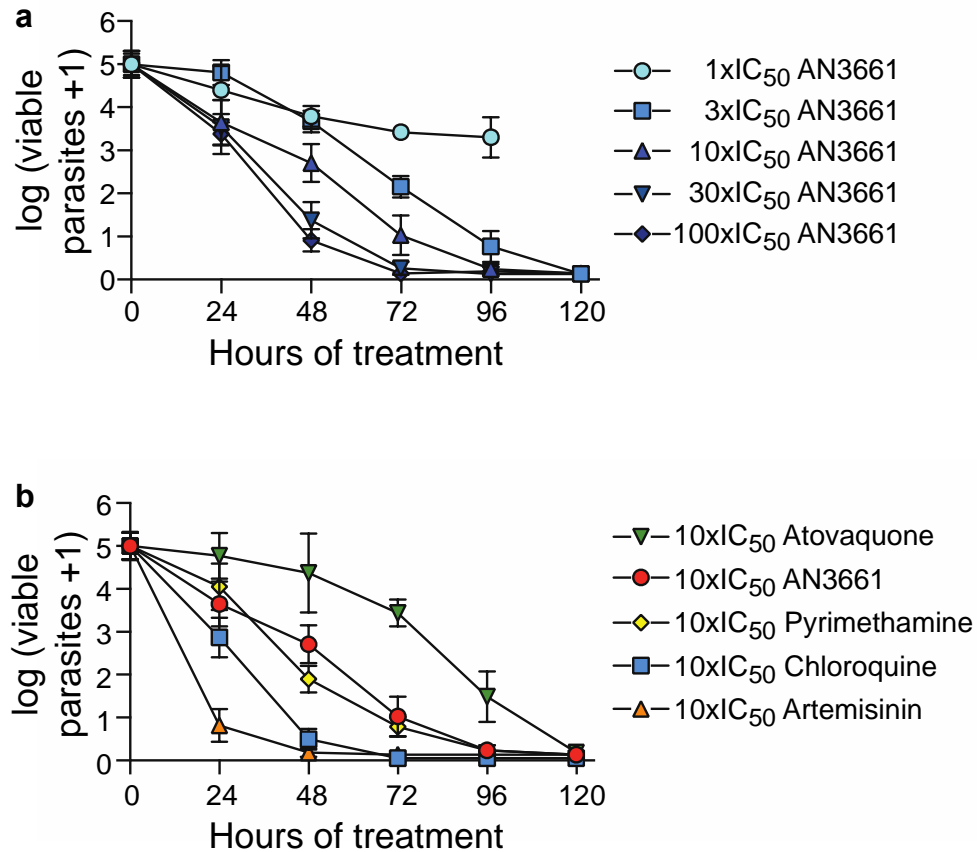

**Supplementary Fig. 1.** Reduction of *P. falciparum* *in vitro*. Parasites treated with (a) 1x, 3x, 10x, 30x, or 100x IC<sub>50</sub> AN3661 for 120 hours, or with (b) 10x IC<sub>50</sub> atovaquone, AN3661, pyrimethamine, chloroquine, or artemisinin for 120 hours. Every 24 hours, samples were collected, the drug was washed out, fresh erythrocytes were added, and culture was continued. Parasitemias were determined at the indicated time points by [<sup>3</sup>H]-hypoxanthine incorporation. Each curve represents the result of 4 independent serial dilutions. Error bars show SD.

## Supplementary Figure 2.

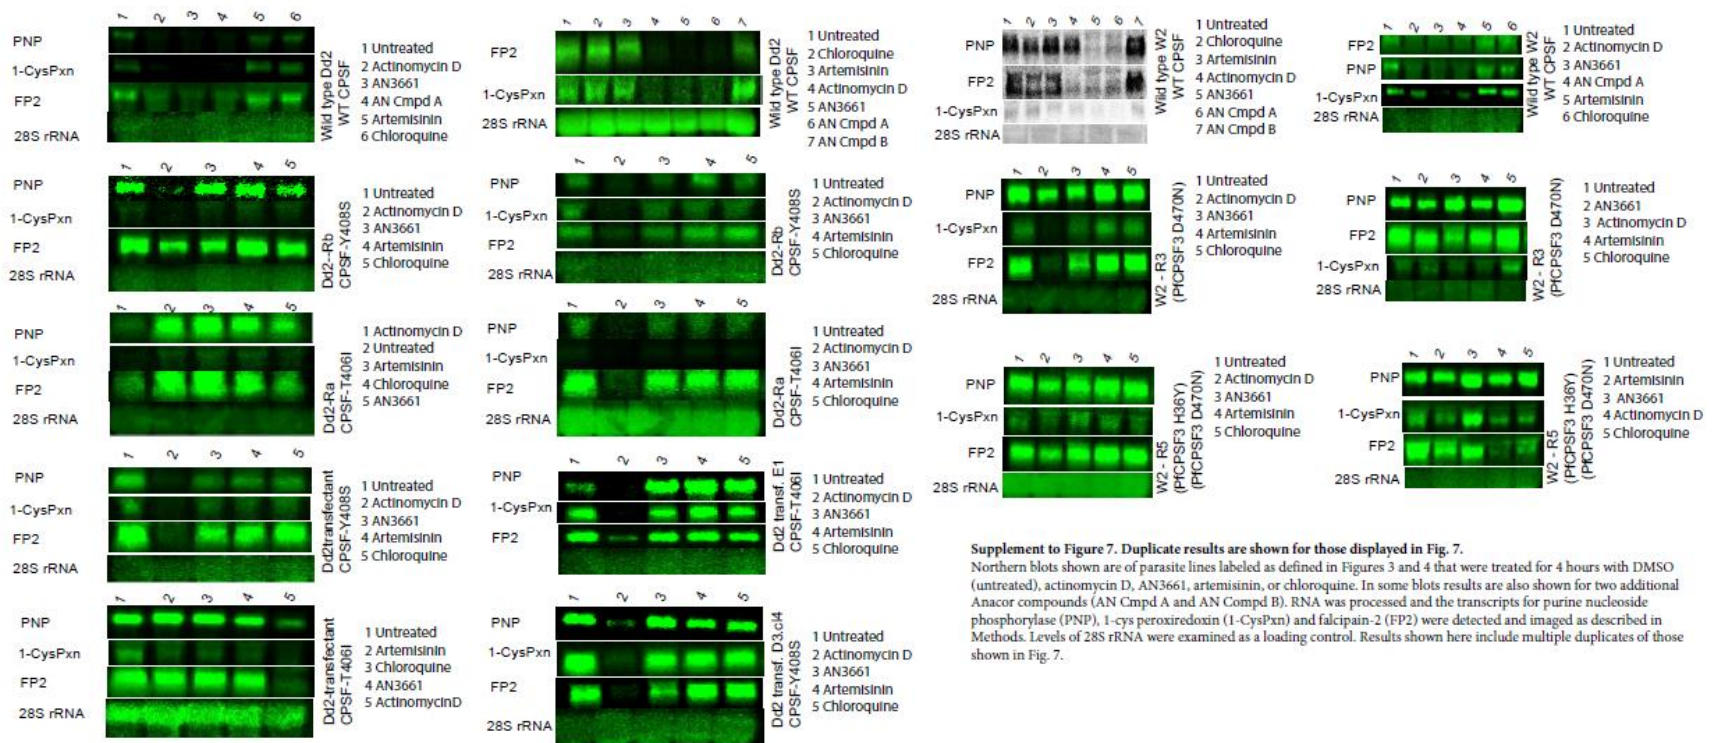

Supplement to Figure 7. Duplicate results are shown for those displayed in Fig. 7.

Northern blots shown are of parasite lines labeled as defined in Figures 3 and 4 that were treated for 4 hours with DMSO (untreated), actinomycin D, AN3661, artemisinin, or chloroquine. In some blots results are also shown for two additional Anacor compounds (AN Cmpd A and AN Cmpd B). RNA was processed and the transcripts for purine nucleoside phosphorylase (PNP), 1-cys peroxidase (1-CysPxn) and falcipain-2 (FP2) were detected and imaged as described in Methods. Levels of 28S rRNA were examined as a loading control. Results shown here include multiple duplicates of those shown in Fig. 7.

Supplementary Figure 3. Uncropped images used to create Figure 7

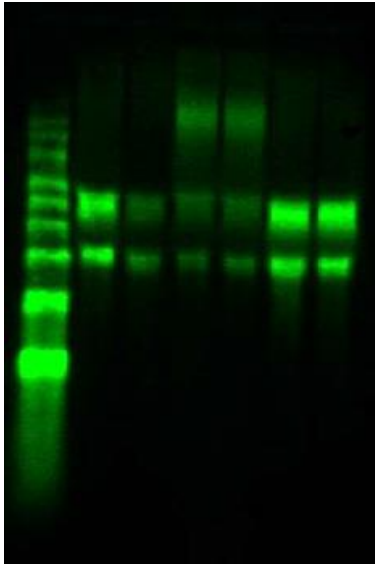

W2 WT-FP2-CysPxn

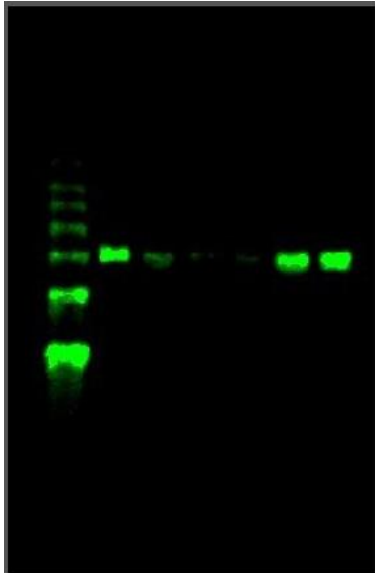

W2 WT-FP2-PNP

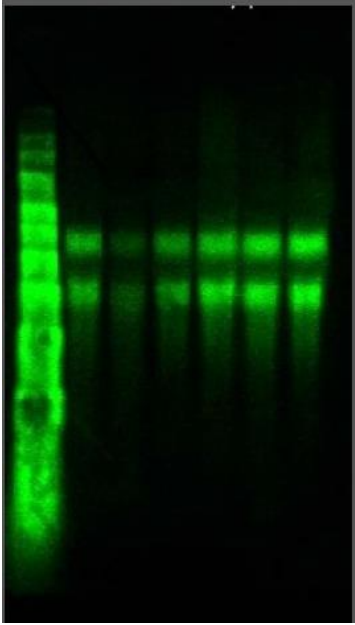

W2 R2-FP2-CysPxn

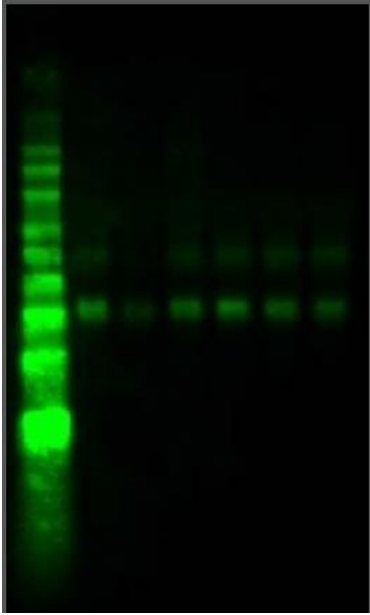

W2 R2-PNP

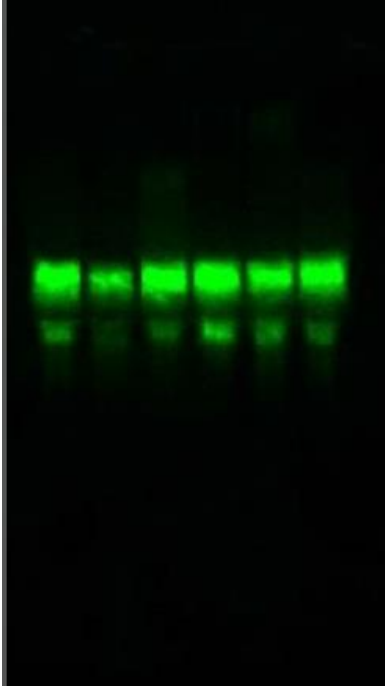

W2 R3-FP2-CysPxn

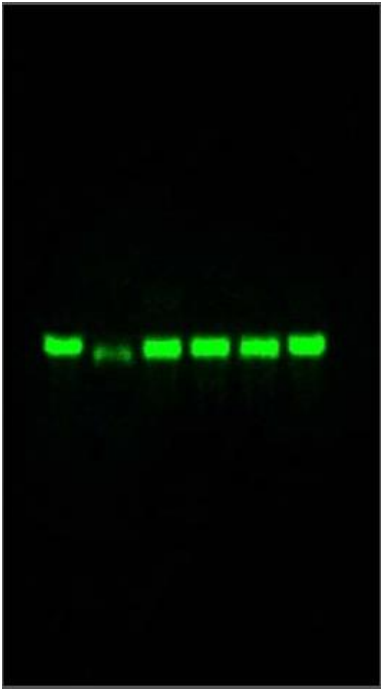

W2 R3-PNP

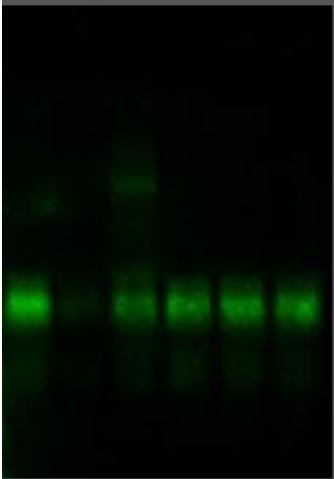

W2 R5-CysPxn

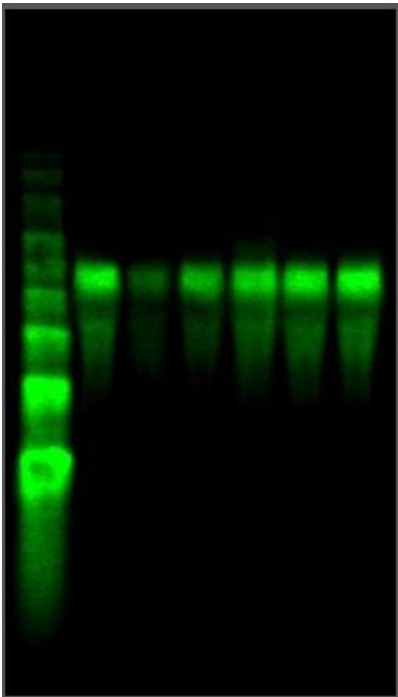

W2 R5-FP2

W2 R5-PNP

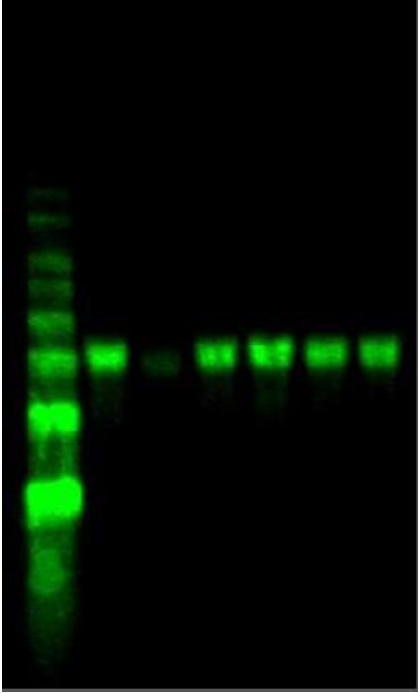

Dd2 WT-FP2

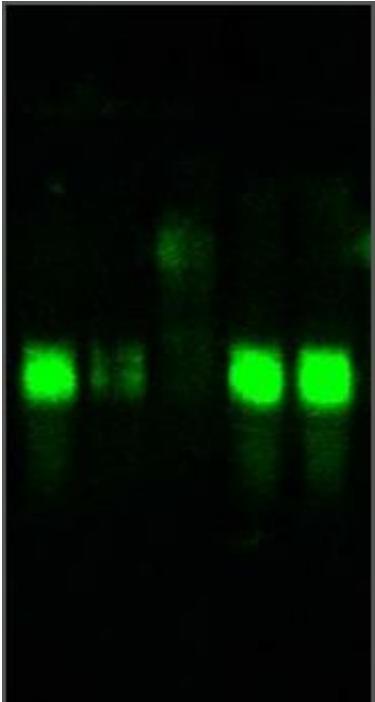

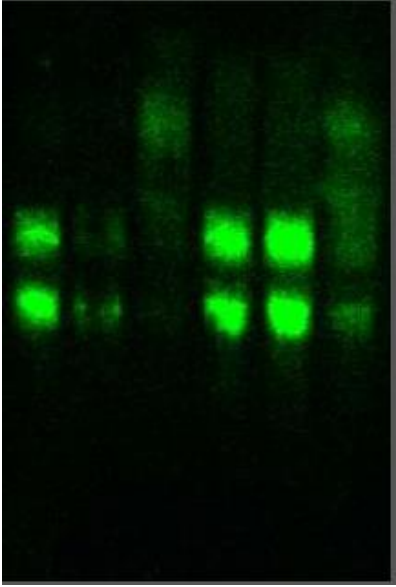

Dd2 WT-FP2-PNP

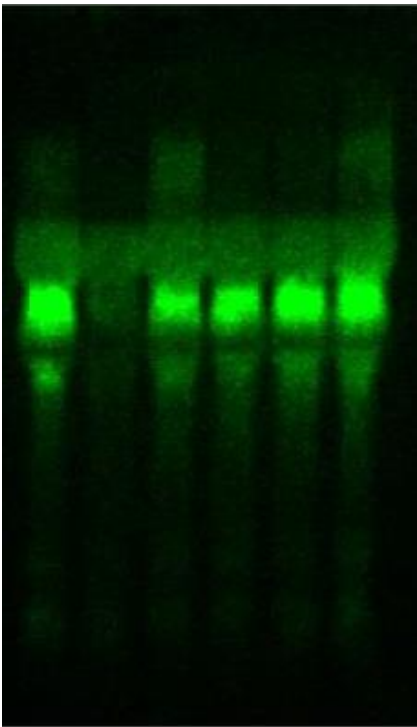

Dd2 Ra-FP2-CysPxn



Dd2 Ra-FP2-PNP

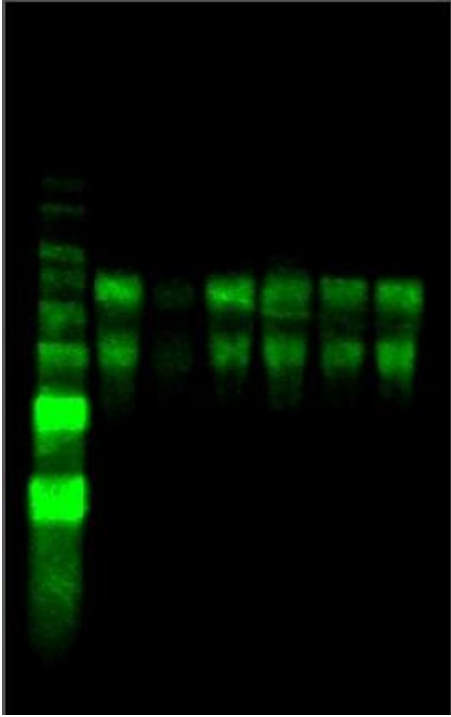

Dd2 Rb-FP2-CysPxn

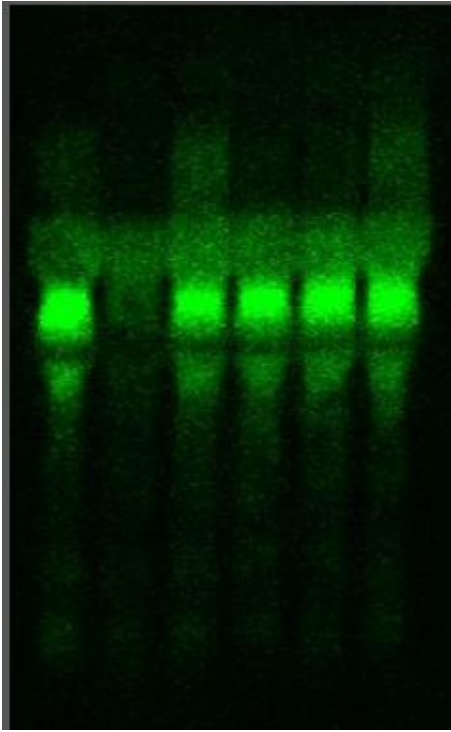

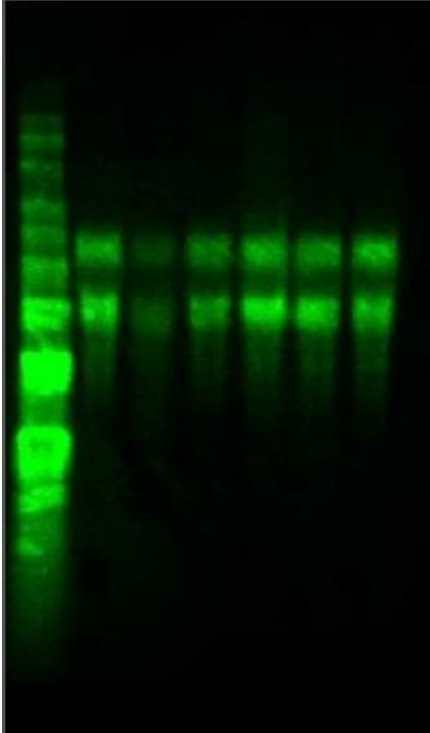

Dd2 Rb-FP2-PNP

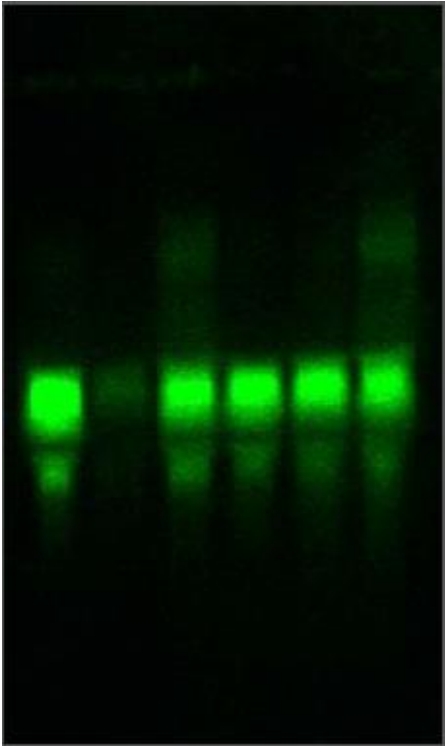

Dd2 D3cl.4-FP2-CysPxn

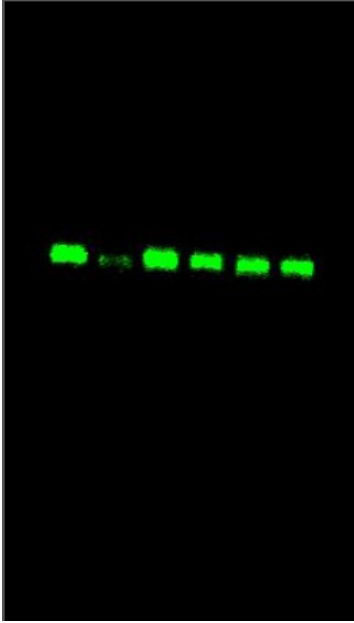

Dd2 D3cl.4-PNP

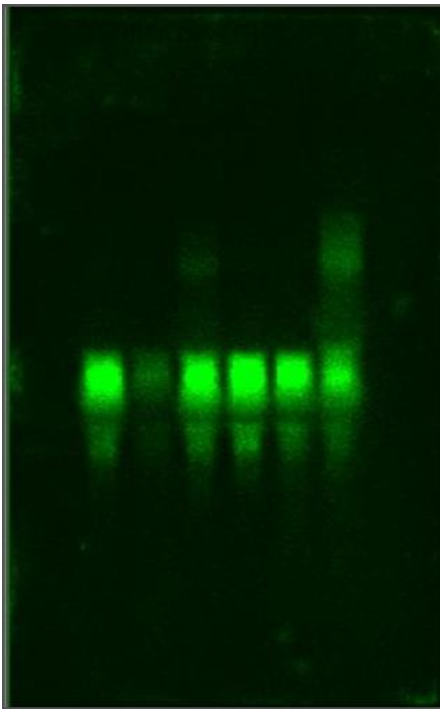

E1-FP2-CysPxn

E1-FP2-PNP

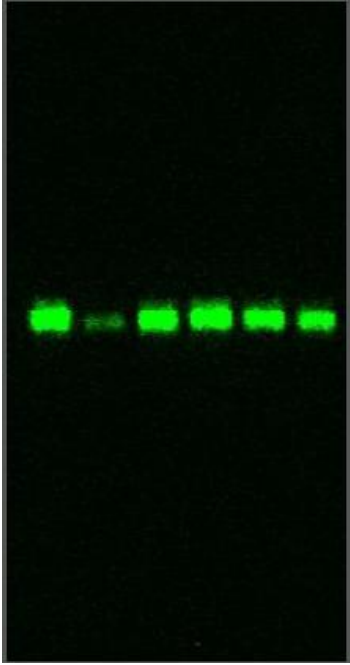

Supplement: ncomms14574-s1.pdf [file ncomms14574-s1.pdf]
